# Supplementary material for: Candida albicans Inhibits Pseudomonas aeruginosa Virulence through Suppression of Pyochelin and Pyoverdine Biosynthesis
Source: PubMed Central journal article supplement (PMC4552174; doi:10.1371/journal.ppat.1005129), 2015-08-27
Supplement: ppat.1005129.s011.pdf [file ppat.1005129.s011.pdf]

**S1 Table. Bacterial and Fungal strains used in this study**

| Strain                                                                                                                                                                                      | Experiment                                                                                                                                                                                                                                                                                                                                                                                                                                                                                                                                                                             |
|---------------------------------------------------------------------------------------------------------------------------------------------------------------------------------------------|----------------------------------------------------------------------------------------------------------------------------------------------------------------------------------------------------------------------------------------------------------------------------------------------------------------------------------------------------------------------------------------------------------------------------------------------------------------------------------------------------------------------------------------------------------------------------------------|
| <p><b><i>Candida albicans</i> SC5314</b></p>                                                                                                                                                | <p>CA/PA GI colonization and dissemination in antibiotic treated and germ-free mice (Fig. 1)<br/>           CA/<i>E. coli</i> GI colonization and dissemination (S4 Fig.)<br/> <i>In Vivo</i> RNASeq Experiments (Fig. 2)<br/>           Iron studies (Fig. 4A)<br/> <i>In Vitro</i> pyochelin and pyoverdine gene expression, pyoverdine production, and cultured colonocyte cytotoxicity experiments (Figs. 5, 6)<br/>           HK CA and CA secreted protein <i>in vivo</i> experiments (Fig. 6)<br/>           Iron-add back experiments (Fig. 7)</p>                             |
| <p><b><i>Candida albicans</i> Can091</b><br/>           Clinical biofilm isolate (Boston, MA, 9/00). Speciated by CHROMAgar. M. Lyon. (Provided by R. Wheeler)</p>                          | <p>CA/PA GI colonization and dissemination in antibiotic treated mice (S2 Fig., S3 Fig.)<br/>           Iron studies (Fig. 4A)<br/> <i>In Vitro</i> pyoverdine experiments (S10 Fig.)</p>                                                                                                                                                                                                                                                                                                                                                                                              |
| <p><b><i>Candida albicans</i> Can098</b><br/>           Clinical bloodstream isolate (Hartford, CT, 3/99). Speciated by CHROMAgar, morphology and PCR. M. Lyon. (Provided by M. Lorenz)</p> | <p>CA/PA GI colonization and dissemination in antibiotic treated mice (S2 Fig., S3 Fig.)<br/>           Iron studies (Fig. 4A)<br/> <i>In Vitro</i> pyoverdine experiments (S10 Fig.)</p>                                                                                                                                                                                                                                                                                                                                                                                              |
| <p><b><i>Candida albicans</i> 3153A</b><br/>           Clinical biofilm isolate [1] (Provided by M. Lorenz)</p>                                                                             | <p>CA/PA GI colonization and dissemination in antibiotic treated mice (S2 Fig., S3 Fig.)<br/>           Iron studies (Fig. 4A)<br/> <i>In Vitro</i> pyoverdine experiments (S10 Fig.)</p>                                                                                                                                                                                                                                                                                                                                                                                              |
| <p><i>P. aeruginosa</i> PAO1</p>                                                                                                                                                            | <p>CA/PA GI colonization and dissemination in antibiotic treated and germ-free mice (Fig. 1, S1 Fig. S2 Fig., S3 Fig.)<br/>           PA/CA-farnesol mutants (S5 Fig.)<br/> <i>In Vivo</i> RNASeq Experiments (Fig. 2)<br/>           PA pyochelin and pyoverdine mutants (Fig. 3, S6 Fig.)<br/> <i>In Vitro</i> pyochelin and pyoverdine gene expression, pyoverdine production, and cultured colonocyte cytotoxicity experiments (Figs. 5, 6)<br/>           HK CA and CA secreted protein <i>in vivo</i> experiments (Fig. 6)<br/>           Iron-add back experiments (Fig. 7)</p> |
| <p><i>P. aeruginosa</i> PAK</p>                                                                                                                                                             | <p>CA/PA GI colonization and dissemination in antibiotic treated mice (S2 Fig., S3 Fig.)<br/> <i>In Vitro</i> pyoverdine experiments (S10 Fig.)</p>                                                                                                                                                                                                                                                                                                                                                                                                                                    |

|                                                                                         |                                                                                                                                                                                                                               |
|-----------------------------------------------------------------------------------------|-------------------------------------------------------------------------------------------------------------------------------------------------------------------------------------------------------------------------------|
| <i>P. aeruginosa</i> PA14                                                               | CA/PA GI colonization and dissemination in antibiotic treated mice (S2 Fig., S3 Fig.)<br><i>In Vitro</i> pyoverdine experiments (S10 Fig.)                                                                                    |
| <i>Bacteroidetes thetaiotamicron</i> VPI-5482                                           | PA/Commensal Bacteria Interactions (S1 Fig.)                                                                                                                                                                                  |
| <i>Blautia producta</i> ATCC 27340                                                      | PA/Commensal Bacteria Interactions (S1 Fig.)                                                                                                                                                                                  |
| <i>Escherichia coli</i> ATCC 10798                                                      | PA/Commensal Bacteria Interactions (S1 Fig.)<br>CA/ <i>E. coli</i> GI colonization and dissemination (S4 Fig.)<br>PA gyrB qPCR specificity (Fig. 4B)<br><i>In Vitro</i> cultured colonocyte cytotoxicity experiments (Fig. 6) |
| <i>Escherichia coli</i> , clinical isolate<br>(bloodstream infection) (This study)      | CA/ <i>E. coli</i> GI colonization and dissemination (S4 Fig.)                                                                                                                                                                |
| <i>Enterococcus faecalis</i> , clinical isolate<br>(bloodstream infection) (This study) | PA/Commensal Bacteria Interactions (S1 Fig.)<br>PA gyrB qPCR specificity (Fig. 4B)                                                                                                                                            |
| <i>Enterobacter cloacae</i> , clinical isolate<br>(bloodstream infection) (This study)  | PA gyrB qPCR specificity (Fig. 4B)                                                                                                                                                                                            |

1. Murciano C, Villamon E, O'Connor JE, Gozalbo D, Gil ML (2006) Killed *Candida albicans* yeasts and hyphae inhibit gamma interferon release by murine natural killer cells. *Infect Immun* 74: 1403-1406.
