# Supplementary material for: Candida albicans Inhibits Pseudomonas aeruginosa Virulence through Suppression of Pyochelin and Pyoverdine Biosynthesis
Source: PubMed Central journal article supplement (PMC4552174; doi:10.1371/journal.ppat.1005129), 2015-08-27
Supplement: ppat.1005129.s013.pdf [file ppat.1005129.s013.pdf]

S3 Table. Primers used in this study

| <b>Gene</b>                                                           | <b>Forward Primer</b>       | <b>Reverse Primer</b> | <b>Probe</b>                  |
|-----------------------------------------------------------------------|-----------------------------|-----------------------|-------------------------------|
| <b><i>P. aeruginosa</i><br/>pyochelin and<br/>pyoverdine<br/>qPCR</b> |                             |                       |                               |
| <i>rpoD</i> (PA0576)                                                  | GGGCGAAGAAGGAAATGGTC        | CAGGTGGCGTAGGTGGAGAA  |                               |
| <i>fptA</i> (PA4221)                                                  | CGGCGTGCTGGTGTAGGTGTAGCCG   | CGCCAACAATCCGTTCTACAT |                               |
| <i>pchA</i> (PA4231)                                                  | CTGCCTGTACTGGGAACAGC        | GCAGAGCAATTGCCAGTTTT  |                               |
| <i>pchB</i> (PA4230)                                                  | CGAGGAAAACGGACTCGAC         | GCGCCAGTACTTGATCTGCT  |                               |
| <i>pchE</i> (PA4226)                                                  | CGGAATTTCTCCTCAACGTG        | AGCAACAGGGTGGTGAAGTC  |                               |
| <i>pchF</i> (PA4225)                                                  | CGATTAGGCTCGCTCTCCAGGTAATCG | CCATCACCTGTGGAACTCG   |                               |
| <i>pchG</i> (PA4224)                                                  | CTGATCGAGCATCCGTTG          | GCGGATAGAAGGTGTTGAGC  |                               |
| <i>pchH</i> (PA4223)                                                  | ACTGAAGGACATGCCTGATG        | GAACAGGGCAATGTTGTCTG  |                               |
| <i>pvdS</i> (PA2426)                                                  | ACCGTACGATCCTGGTGAAG        | TGAACGACGAAGTGATCTGC  |                               |
| <i>pvdL</i> (PA2424)                                                  | CCAGCTCGACTACTGGAAGG        | CTCAGGTCAAGCGGTAGAG   |                               |
| <i>pvdH</i> (PA2413)                                                  | CAGTTCCTGCCGTATCCCTA        | GGATCGTTCAGCAGGTTCTC  |                               |
| <i>pchD</i> (PA4228)                                                  | GCGACAAGGACCAGATCAAC        | GATGGGCTATCAGCAGGTTT  |                               |
| <i>ampP</i> (PA4218)                                                  | CTGGGTCGACAATCACTGGT        | GATCTGTACCGCGTTGACCT  |                               |
| <b><i>P. aeruginosa</i><br/><i>gyrB</i> qPCR</b>                      |                             |                       |                               |
| <i>gyrB</i> (PA0004)                                                  | CAGGAGCAGTACATCAAGGAC       | TTGACCAGTTTCTCCAGCG   | ATGGAAGAGTACATGACCCAG<br>TCGG |
