# Supplementary material for: Candida albicans Inhibits Pseudomonas aeruginosa Virulence through Suppression of Pyochelin and Pyoverdine Biosynthesis
Source: PubMed Central journal article supplement (PMC4552174; doi:10.1371/journal.ppat.1005129), 2015-08-27
Supplement: ppat.1005129.s014.pdf [file ppat.1005129.s014.pdf]

**S4 Table. *Pseudomonas aeruginosa* strains and plasmids used in this study to generate PA pyochelin/pyoverdine knockout mutants**

| Name                                | Relevant Characteristics                                                                                                                        | Reference                 |
|-------------------------------------|-------------------------------------------------------------------------------------------------------------------------------------------------|---------------------------|
| <b><i>E. coli</i> strains</b>       |                                                                                                                                                 |                           |
| DH5 $\alpha$                        | <i>recA1 endA1 hsdR17 deoR thi-1 supE44 gyrA96 relA1 <math>\Delta</math>(lacZYA-argF) U169 (<math>\Phi</math>80dlacZ<math>\Delta</math>M15)</i> | Sambrook & Russell (2001) |
| <b><i>P. aeruginosa</i> strains</b> |                                                                                                                                                 |                           |
| PAO1                                | Wild-type                                                                                                                                       | ATCC 15692                |
| PAO6297                             | PAO1 $\Delta$ <i>pchBA</i>                                                                                                                      | Reimann et al. (1998)     |
| PAO6310                             | PAO1 $\Delta$ <i>pchE</i>                                                                                                                       | Reimann et al. (1998)     |
| PAO6428                             | PAO1 $\Delta$ <i>fptA</i>                                                                                                                       | Michel et al. (2007)      |
| PAO6382                             | PAO1 $\Delta$ <i>pvdF</i>                                                                                                                       | Hoegy et al. (2009)       |
| PAO6383                             | PAO1 $\Delta$ <i>pchBA</i> $\Delta$ <i>pvdF</i>                                                                                                 | Michel et al. (2007)      |
| PAO6901                             | PAO1 <i>pvdS::Gm<sup>r</sup></i>                                                                                                                | This study                |
| PAO6902                             | PAO1 <i>pvdS::Gm<sup>r</sup> <math>\Delta</math> pchBA</i>                                                                                      | This study                |
| PA258                               | PAO1 $\Delta$ <i>pvdH</i>                                                                                                                       | This study                |
| PA259                               | PAO1 $\Delta$ <i>pchBA</i> $\Delta$ <i>pvdH</i>                                                                                                 | This study                |
| <b>Plasmids</b>                     |                                                                                                                                                 |                           |
| pME6000                             | pBBR1 ori, Tet <sup>r</sup> <i>lacZ mob<sup>+</sup></i>                                                                                         | Maurhofer et al. (1998)   |
| pME6477                             | pME6000 derivative carrying <i>pchDCBA</i> , Tet <sup>r</sup>                                                                                   | This study                |

Tet<sup>r</sup>, tetracycline resistance; Gm<sup>r</sup>, gentamicin resistance

Hoegy, F., Lee, X., Noel, S., Rognan, D., Mislin, G. L., Reimann, C. & Schalk, I. J. (2009). Stereospecificity of the siderophore pyochelin outer membrane transporters in fluorescent pseudomonads. *J Biol Chem* 284, 14949-14957.

Maurhofer, M., Reimann, C., Schmidli-Sacherer, P., Heeb, S., Haas, D. & Défago, G. (1998). Salicylic acid biosynthetic genes expressed constitutively in the root-colonizing *Pseudomonas fluorescens* strain P3 improve the induction of systemic resistance in tobacco against tobacco necrosis virus. *Phytopathology* 88, 678-684.

Michel, L., Bachelard, A. & Reimann, C. (2007). Ferripyochelin uptake genes are involved in pyochelin-mediated signalling in *Pseudomonas aeruginosa*. *Microbiology* 153, 1508-1518.

Reimann, C., Serino, L., Beyeler, M., & Haas, D. (1998) Dihydroaeruginosic acid synthetase and pyochelin synthetase, products of the *pchEF* genes are induced by extracellular pyochelin in *Pseudomonas aeruginosa*. *Microbiology* 144, 3135-3148.

Sambrook, J. & Russell, D. W. (2001). *Molecular cloning: a laboratory manual, 3rd edition*. Cold Spring Harbor, N.Y.: Cold Spring Harbor Laboratory.
