# Supplementary material for: Candida albicans Inhibits Pseudomonas aeruginosa Virulence through Suppression of Pyochelin and Pyoverdine Biosynthesis
Source: PLoS Pathog. 2015 Aug 27;11(8):e1005129. doi: 10.1371/journal.ppat.1005129 (PMC4552174; doi:10.1371/journal.ppat.1005129)
Supplement: S2 Table — (PDF) [file ppat.1005129.s012.pdf]

S2 Table. RNA-Seq Mapping Statistics

[illegible]
